# Supplementary material
Source: publisher site journal article supplement (https://www.dovepress.com/article/160011)
Supplement: Supplementary file 1 [file get_supplementary_file.php]

**Online supplement**

- Patients were recruited between July 2013 and September 2015 from 356 investigational centres in 43 countries

Supplemental figures:

Figure 1. Evolution of the management of exacerbations in patients with >1 event

i) Patients with  $\geq 2$  exacerbations

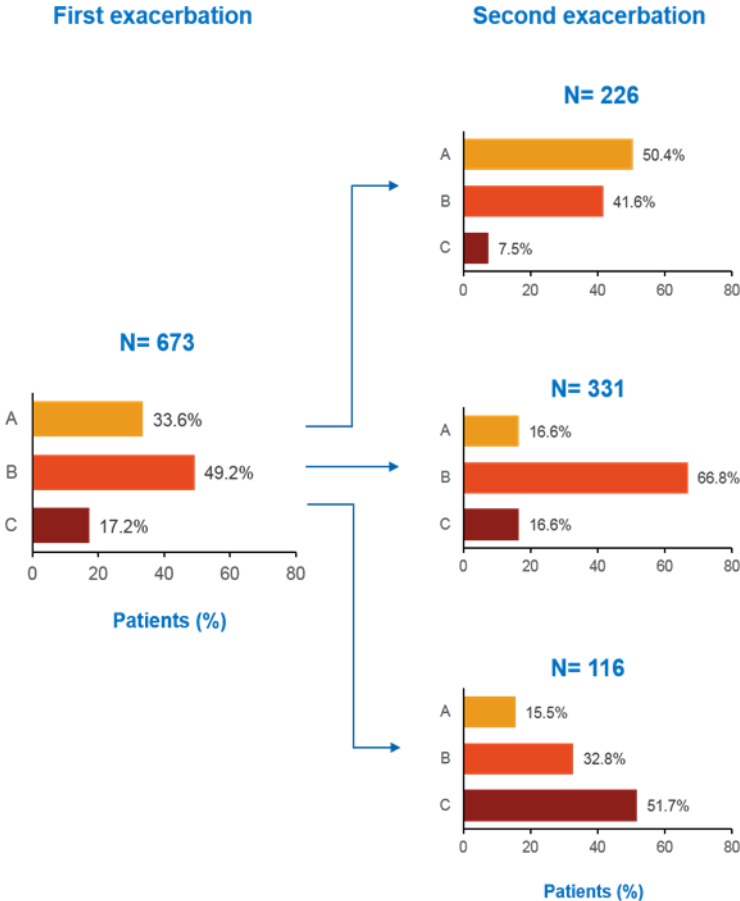

A = Antibiotics  
B = Both (antibiotics + corticosteroids)  
C = Corticosteroids

ii) Patients with  $\geq 3$  exacerbations

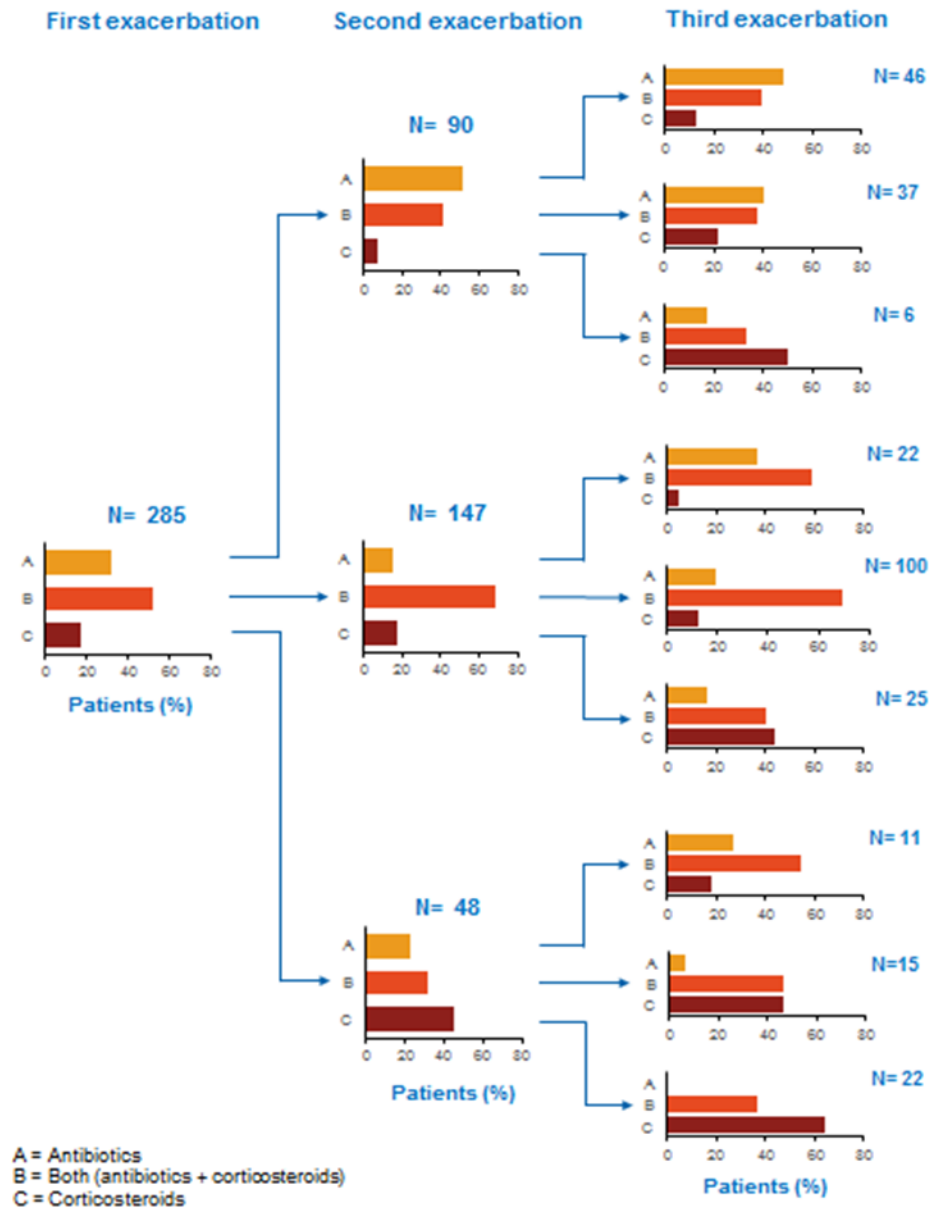

Treatment was evaluated according to the use of antibiotics (A), corticosteroids (C) or both (B).

i) Patients that presented  $\geq 2$  events ii) Patients that presented  $\geq 3$  events. Patients who presented with  $>3$  events are a subpopulation of patients who presented with  $\geq 2$  events.

**Table 1.** List of institutional review boards or ethics committees.

| # | EC/IRB country | Site Number(s)                                       | EC/IRB Name                                                                                        | EC/IRB Department | EC/IRB City (State/Province) |
|---|----------------|------------------------------------------------------|----------------------------------------------------------------------------------------------------|-------------------|------------------------------|
|   | Argentina      | 4003;#4008;#4011;#4014;#4017;#4019;#4023;#4027;#4029 | Comite Independiente de Etica para Ensayos en Farmacologia Clinica                                 | NA                | CABA (Buenos Aires)          |
|   | Argentina      | 4001;#4002;#4004;#4007;#4013;#4018;#4021;#4025       | Comite de Etica en Investigacion Clinica                                                           | NA                | CABA (Buenos Aires)          |
|   | Argentina      | 4005                                                 | Comite Independiente de etica para ensayos en farmacologia clinica del centro medico Dra. De Salvo | NA                | CABA (Buenos Aires)          |
|   | Argentina      | 4010                                                 | Comite de etica en Investigaciones Biomedicas Sanatorio Otamendi y Miroli S.A                      | NA                | CABA (Buenos Aires)          |
|   | Argentina      | 4016                                                 | Comite de Bioetica CIMEL                                                                           | NA                | Lanus Este (Buenos Aires)    |
|   | Argentina      | 4020                                                 | Comite de Etica en Inestigacion                                                                    | NA                | CABA (Buenos Aires)          |
|   | Argentina      | 4022                                                 | Comite de Etica en Investigacion Instituto de Investigaciones Clinicas                             | NA                | Mar del Plata (Buenos Aires) |
|   | Argentina      | 4024;#4028                                           | Comite de Etica en Investigacion Instituto Ave Pulmo                                               | NA                | Mar del Plata (Buenos Aires) |
|   | Argentina      | 4030                                                 | Comite de Etica en Investigacion de INAER                                                          | NA                | CABA (Buenos Aires)          |

|  |          |                                                                                                            |                                                                                                          |                                |                                                       |
|--|----------|------------------------------------------------------------------------------------------------------------|----------------------------------------------------------------------------------------------------------|--------------------------------|-------------------------------------------------------|
|  | Austria  | 4110;#4111;#4112;#4113;#4114;#4115;#4116;#4117;#4118;#4119                                                 | Ethikkommission des Landes<br>Oberösterreich                                                             |                                | Linz<br>(Oberösterreich)                              |
|  | Belgium  | 4140;#4141;#4142;#4143;#4145;#4146;#4147;#4148;#4149;#4150;#4151;#4152;#4153;#4155;#4156;#4159;#4160;#4161 | Commissie Medische Ethiek UZ<br>Brussel                                                                  |                                | Brussels                                              |
|  | Bulgaria | 4200;#4201;#4202;#4203;#4204;#4205;#4206;#4207;#4208;#4209;#4210                                           | Ethics Committee for Multicenter<br>Trials                                                               |                                | Sofia                                                 |
|  | Canada   | 4232;#4233;#4234;#4247;#4236;#4238;#4245;#4243;#4246;#4244                                                 | Institutional Review Board<br>Services                                                                   |                                | Aurora<br>(Ontario)                                   |
|  | Canada   | 4239                                                                                                       | Comité d'éthique de la<br>recherche sur l'humain du<br>Centre hospitalier universitaire<br>de Sherbrooke |                                | Fleurimont<br>(Quebec)                                |
|  | Canada   | 4235                                                                                                       | Conjoint Health Research Ethics<br>Board                                                                 | Research<br>Services<br>Office | Calgary<br>(Alberta)                                  |
|  | Chile    | 4263                                                                                                       | Comité Ético Científico Hospital<br>Dr. Gustavo Fricke. Servicio de<br>Salud Viña del Mar - Quillota     |                                | Viña del Mar                                          |
|  | Chile    | 4261                                                                                                       | Comité de Ética Científico<br>Servicio de Salud Metropolitano<br>Oriente                                 |                                | Santiago,<br>Providencia<br>(Región<br>Metropolitana) |
|  | Chile    | 4266                                                                                                       | Comité Ético Científico Servicio<br>de Salud Metropolitano Sur                                           |                                | Santiago, San<br>Miguel                               |

|  |       |      |                                                                                    |  |                                |
|--|-------|------|------------------------------------------------------------------------------------|--|--------------------------------|
|  |       |      |                                                                                    |  | (Región Metropolitana)         |
|  | China | 4300 | Ethical Committee of the First Affiliated Hospital of Guangzhou Medical University |  | Guangzhou (Guangdong Province) |
|  | China | 4302 | Ethical Committee of the First Affiliated Hospital of Chinese PLA General Hospital |  | Beijing (Beijing)              |
|  | China | 4301 | Ethical Committee of the General Hospital of Guangzhou Military Command of PLA     |  | Guangzhou (Guangdong Province) |
|  | China | 4303 | Ethical Committee of Beijing Friendship Hospital, Capital Medical University       |  | Beijing (Beijing)              |
|  | China | 4304 | Ethical Committee of Peking Union Medical College Hospital                         |  | Beijing (Beijing Province)     |
|  | China | 4305 | Ethical Committee of The Third Xiangya Hospital of Central South University        |  | Changsha (Hunan Province)      |
|  | China | 4306 | Ethical Committee of West China Hospital of Sichuan University                     |  | Chengdu (Sichuan)              |
|  | China | 4307 | Ethical Committee of Southwest Hospital, the Third Military Medical University     |  | Chongqing (Chongqing)          |
|  | China | 4308 | Ethical Committee of The Second Affiliated Hospital of                             |  | Chongqing (Chongqing)          |

|  |       |      |                                                                                                    |                                  |
|--|-------|------|----------------------------------------------------------------------------------------------------|----------------------------------|
|  |       |      | Third Military Medical University                                                                  |                                  |
|  | China | 4309 | Ethical Committee of Hainan provincial people's Hospital                                           | Haikou<br>(Hainan Province)      |
|  | China | 4310 | Ethical Committee of Hangzhou First People's Hospital                                              | Hangzhou<br>(Zhejiang Province)  |
|  | China | 4312 | Ethical Committee of The Jiangxi Provincial People's Hospital                                      | Nanchang<br>(Jiangxi Province)   |
|  | China | 4313 | Ethical Committee of The First Affiliated Hospital of Nanchang University                          | Nanchang<br>(Jiangxi Province)   |
|  | China | 4315 | Ethical Committee of Shanghai Pulmonary Hospital                                                   | Shanghai<br>(Shanghai)           |
|  | China | 4316 | Ethical Committee of Ruijin Hospital Affiliated to Shanghai JiaoTong University School of Medicine | Shanghai<br>(Shanghai)           |
|  | China | 4317 | Ethical Committee of The General Hospital of Shenyang Military Region                              | Shenyang<br>(Liaoning Province)  |
|  | China | 4318 | Ethical Committee of The Second Hospital of Hebei Medical University                               | Shijiazhuang<br>(Hebei Province) |
|  | China | 4320 | Ethical Committee of The First Affiliated Hospital of Soochow                                      | Suzhou<br>(Jiangsu)              |

|  |                |                                                            |                                                                                              |                           |                            |
|--|----------------|------------------------------------------------------------|----------------------------------------------------------------------------------------------|---------------------------|----------------------------|
|  |                |                                                            | University                                                                                   |                           | Province)                  |
|  | China          | 4321                                                       | Ethical Committee of The General Hospital Tianjin Medical University                         |                           | Tianjin (Tianjin)          |
|  | China          | 4322                                                       | Ethical Committee of The First Affiliated Hospital of the Fourth Military Medical University |                           | Xi'an (Shanxi Province)    |
|  | China          | 4323                                                       | Ethical Committee of Jiangsu Province Hospital                                               |                           | Nanjing (Jiangsu Province) |
|  | Colombia       | 4400                                                       | Comité de ética en Investigación - Fundación Cardiomet Eje Cafetero                          | NA                        | Manizales (Caldas)         |
|  | Colombia       | 4401                                                       | Comité de Etica de la investigación CAIMED                                                   | NA                        | Bogotá (Cundinamarca)      |
|  | Colombia       | 4402                                                       | Comité Medico, Etico, Científico Asesor - Clínica Soma                                       | NA                        | Medellín (Antioquia)       |
|  | Colombia       | 4403                                                       | Comité de ética en Investigación CEI- FOSCAL                                                 | NA                        | Floridablanca (Santander)  |
|  | Croatia        | 1770;#1771;#1772                                           | SEP - Sredisnje eticko povjerenstvo                                                          |                           | Zagreb                     |
|  | Czech Republic | 4420;#4421;#4422;#4423;#4424;#4426;#4427;#4432;#4425;#4436 | Etická komise IKEM a TN                                                                      | Thomayerov a nemocnice    | Praha 4 -Krc               |
|  | Czech Republic | 4430;#4435                                                 | Eticka komise                                                                                | Vitkovicka nemocnice a.s. | Ostrava - Vitkovice        |
|  | Czech          | 4433                                                       | Eticka komise                                                                                | Nemocnice                 | Melnik                     |



|  |                |                                                                        |                                                        |                                            |                                  |
|--|----------------|------------------------------------------------------------------------|--------------------------------------------------------|--------------------------------------------|----------------------------------|
|  | Republic       |                                                                        |                                                        | Melnik                                     |                                  |
|  | Czech Republic | 4434                                                                   | Etická komise                                          | Nemocnice Rudolfa a Stefanie Benešov, a.s. | Benešov                          |
|  | Czech Republic | 4437                                                                   | Etiická komise FN a LF UP Olomouc                      |                                            | Olomouc                          |
|  | Czech Republic | 4428;#4429;#4431                                                       | Etická komise IKEM a TN                                | Thomayerov a nemocnice                     | Praha 4 - Krc                    |
|  | Denmark        | 4460;#4461;#4462;#4463;#4464;#4465;#4466;#4467;#4468                   | De Videnskabsetiske Komiteer                           | Region Hovedstaden                         | Hillerød                         |
|  | Estonia        | 4500;#4501;#4502                                                       | Tallinn Medical Research Ethics Committee              | NA                                         | Tallinn (NA)                     |
|  | Finland        | All sites/central Vote;#4520;#4521;#4523;#4524;#4525;#4526             | Keski-Suomen sairaanhoitopiirintieteellinen toimikunta |                                            | Jyväskylä                        |
|  | France         | 4540;#4541;#4542;#4543;#4544;#4545;#4546;#4548;#4551;#4552;#4554;#4555 | CPP Ile de France XI                                   | Centre Hospitalier de Saint-Germain-Laye   | Saint Germain en Laye Cedex (NA) |
|  | Germany        | All sites/central Vote                                                 | Ethikkommission Medizinische Fakultät Heidelberg       | Medizinische Fakultät Heidelberg           | Heidelberg (Baden-Württemberg)   |
|  | Greece         | 4710;#4711;#4712;#4713;#4714;#4715;#4717;#4718;#4719;#4720;#4721       | National Ethics Committee (EED)                        |                                            | Cholargos (Attiki)               |

|  |           |                              |                                                                                                                 |                                                     |                                   |
|--|-----------|------------------------------|-----------------------------------------------------------------------------------------------------------------|-----------------------------------------------------|-----------------------------------|
|  | Guatemala | 4740;#4741;#4742;#4743;#4745 | Comité de Ética Independiente<br>ZUGUEME                                                                        |                                                     | Guatemala City<br>(Guatemala)     |
|  | Hong Kong | 4761                         | Joint Chinese University of Hong<br>Kong- New territories East<br>cluster Clinical Research Ethics<br>Committee | NA                                                  | Hong Kong<br>(NA)                 |
|  | Hong Kong | 4762                         | Kowloon West Cluster Research<br>Ethics Committee                                                               | NA                                                  | Hong Kong<br>(NA)                 |
|  | Hungary   | All sites/central<br>Vote    | Medical Research Council                                                                                        | Ethics<br>Committee<br>for Clinical<br>Pharmacology | Budapest                          |
|  | Iceland   | 4810                         | The National Bioethics<br>Committee                                                                             |                                                     | Reykjavik                         |
|  | India     | 4823                         | Institutional Ethical Review<br>Board                                                                           |                                                     | Bangalore<br>(Karnataka)          |
|  | India     | 4827                         | KRIMS Ethics Committee                                                                                          |                                                     | Nagpur<br>(Maharashtra)           |
|  | India     | 4828                         | Institutional Ethics Committee                                                                                  |                                                     | Coimbatore<br>(Tamil Nadu)        |
|  | India     | 4830                         | Institutional Ethics Committee                                                                                  |                                                     | Visakhapatnam<br>(Andhra Pradesh) |
|  | India     | 4831                         | Fortis Hospital Ethics Committee                                                                                |                                                     | Kolkata<br>(West Bengal)          |
|  | India     | 4833                         | Ethics Committee of Care<br>Institute of Medical Sciences                                                       |                                                     | Ahmedabad<br>(Gujarat)            |

|  |       |      |                                                                                |                                                                  |                               |
|--|-------|------|--------------------------------------------------------------------------------|------------------------------------------------------------------|-------------------------------|
|  | India | 4835 | Drug Trial Ethics Committee                                                    |                                                                  | Ludhiana<br>(Punjab)          |
|  | India | 4837 | Institutional Human Ethics<br>Committee                                        |                                                                  | Coimbatore<br>(Tamil Nadu)    |
|  | India | 4838 | AMC MET Ethics Committee                                                       |                                                                  | Ahmedabad<br>(Gujarat)        |
|  | India | 4840 | Paras Hospital Ethics Committee                                                |                                                                  | Gurgaon<br>(Harayana)         |
|  | India | 4841 | Institutional Ethics Committee                                                 |                                                                  | Hyderabad<br>(Andhra Pradesh) |
|  | India | 4843 | Getwell Institutional Ethics<br>Committee (GIEC)                               |                                                                  | Nagpur<br>(Maharashtra)       |
|  | Italy | 4890 | Comitato per la Sperimentazione<br>Clinica dei Medicinali Area Vasta<br>Nord   | c/o Azienda<br>Ospedaliero<br>Universitaria<br>Pisana di<br>Pisa | Pisa                          |
|  | Italy | 4891 | Comitato Etico per le<br>Sperimentazioni Cliniche della<br>Provincia di Padova | C/O AOU<br>Padova                                                | Padova                        |
|  | Italy | 4892 | Comitato Etico Regionale Unico<br>(CERU)                                       | c/o Azienda<br>Ospedaliero<br>universitaria                      | Udine                         |
|  | Italy | 4893 | Comitato Etico Area di Pavia                                                   | c/o<br>Fondazione<br>Irccs<br>Policlinico                        | Pavia                         |

|  |       |      |                                                                              |                                                                          |               |
|--|-------|------|------------------------------------------------------------------------------|--------------------------------------------------------------------------|---------------|
|  |       |      |                                                                              | San                                                                      |               |
|  | Italy | 4894 | Comitato Etico Seconda<br>Universita' Degli Studi di Napoli                  | Aou<br>Sunaorn                                                           | Napoli        |
|  | Italy | 4895 | Comitato Etico Provinciale di<br>Varese                                      | c/o<br>Ospedale di<br>Circolo e                                          | Varese        |
|  | Italy | 4897 | Comitato Etico Dell'Azienda<br>Ospedaliero-Universitaria<br>Ospedali Riuniti |                                                                          | Foggia        |
|  | Italy | 4898 | Comitato Etico Milano Area C                                                 | c/o Azienda<br>Ospedaliera<br>Ospedale<br>Niguarda<br>Ca'                | Milano        |
|  | Italy | 4899 | Comitato Etico per la<br>Sperimentazione Clinica delle<br>Province di Verona | C/O AOUI<br>Verona                                                       | Verona        |
|  | Italy | 4900 | Comitato Etico Provinciale di<br>Reggio Emilia                               | c/o Azienda<br>Ospedaliera<br>Arcispedale<br>S. Maria<br>Nuova/IRCC<br>S | Reggio emilia |
|  | Italy | 4901 | Comitato Etico Dell'IRCCS<br>Fondazione Don Carlo Gnocchi<br>di Milano       | Centro S.<br>Maria<br>Nascente                                           | Milano        |
|  | Italy | 4902 | Comitato Etico Della Provincia di                                            | C/O Azienda                                                              | Modena        |

|  |       |                                    |                                                                                           |                                                                                                                       |                      |
|--|-------|------------------------------------|-------------------------------------------------------------------------------------------|-----------------------------------------------------------------------------------------------------------------------|----------------------|
|  |       |                                    | Modena                                                                                    | Policlinico,                                                                                                          |                      |
|  | Italy | 4903                               | Comitato Etico Aree Cremona,<br>Mantova e Lodi                                            | c/o AO di<br>Cremona                                                                                                  | Cremona              |
|  | Italy | 4904                               | Comitato Etico Regionale (CER)                                                            | c/o Azienda<br>Ospedaliera<br>Universitaria<br>Ospedali<br>Riuniti<br>Umberto I-<br>Lancisi-Gm<br>Salesi di<br>Ancona | Ancona               |
|  | Italy | 4906;#4905                         | Comitato Etico Centrale<br>Dell'IRCCS Fondazione<br>Salvatore Maugeri (IRCCS) di<br>Pavia |                                                                                                                       | Pavia                |
|  | Italy | 4908                               | Comitato Etico Dell' IRCCS<br>Ospedale Oncologico di Bari                                 |                                                                                                                       | Bari                 |
|  | Italy | 4909                               | Comitato Etico Regione Liguria                                                            | c/o IRCCS<br>Aou San<br>Martino - Ist<br>Istituto<br>Nazionale<br>per la<br>Ricerca Sul<br>Cancro                     | Genova               |
|  | Japan | 1009;#1011;#1014;#1020;#1006;#1012 | National Hospital Organization<br>CRB                                                     | National<br>Hospital                                                                                                  | Meguro-ku<br>(Tokyo) |

|  |       |      |                                         | Organization                |                         |
|--|-------|------|-----------------------------------------|-----------------------------|-------------------------|
|  | Japan | 1000 | Nihon Koukan Hospital IRB               | Nihon<br>Koukan<br>Hospital | Kawasaki<br>(Kanagawa)  |
|  | Japan | 1001 | Tokyo-Eki Center-building Clinic<br>IRB |                             | Chuo-ku<br>(Tokyo)      |
|  | Japan | 1002 | Nakatani Hospital IRB                   |                             | Himeji<br>(Hyogo)       |
|  | Japan | 1003 | JCHO Hokkaido Hospital IRB              |                             | Sapporo<br>(Hokkaido)   |
|  | Japan | 1004 | Tenryu Hospital IRB                     |                             | Hamamatsu<br>(Shizuoka) |
|  | Japan | 1005 | Kishiwada City Hospital IRB             |                             | Kishiwada<br>(Osaka)    |
|  | Japan | 1007 | Sakaide City Hospital IRB               |                             | Sakaide<br>(Kagawa)     |
|  | Japan | 1008 | Hamamatsu Rosai Hospital IRB            |                             | Hamamatsu<br>(Shizuoka) |
|  | Japan | 1010 | Matsusaka City Hospital IRB             |                             | Matsusaka<br>(Mie)      |
|  | Japan | 1013 | Tosei General Hospital IRB              |                             | Seto<br>(Aichi)         |
|  | Japan | 1015 | Obihiro Kokyukika Naika<br>Hospital IRB |                             | Obihiro<br>(Japan)      |
|  | Japan | 1016 | Iwata City Hospital IRB                 |                             | Iwata<br>(Shizuoka)     |
|  | Japan | 1017 | Takamatsu Manicipal Hospital            |                             | Takamatsu               |

|  |        |                      |                                             |                                               |                        |
|--|--------|----------------------|---------------------------------------------|-----------------------------------------------|------------------------|
|  |        |                      | IRB                                         |                                               | (Kagawa)               |
|  | Japan  | 1018                 | Daido Hospital IRB                          |                                               | Nagoya<br>(Aichi)      |
|  | Japan  | 1019                 | Nagata Hospital IRB                         |                                               | Yanagawa<br>(Fukuoka)  |
|  | Japan  | 1021                 | Harasanshin Hospital IRB                    |                                               | Fukuoka<br>(Fukuoka)   |
|  | Japan  | 1022                 | Tohoku University Hospital IRB              |                                               | Sendai<br>(Miyagi)     |
|  | Japan  | 1023                 | Nihon University Hospitals' Joint<br>IRB    | Nihon<br>University<br>Hospitals              | Itabashi-ku<br>(Tokyo) |
|  | Japan  | 1024                 | Juntendo University Hospitals<br>IRB        |                                               | Bunkyo-ku<br>(Tokyo)   |
|  | Japan  | 1025                 | Hokkaido University Hospital<br>IRB         |                                               | Sapporo<br>(Tokyo)     |
|  | Japan  | 1026                 | Fujita Health University hospital<br>IRB    |                                               | Toyoake<br>(Aichi)     |
|  | Japan  | 1027                 | Kyoto University Hospital IRB               |                                               | Kyoto<br>(Kyoto)       |
|  | Japan  | 1028                 | ICR Clinical Research Tokyo<br>Hospital IRB | ICR Clinical<br>Research<br>Tokyo<br>Hospital | Shinjuku-ku<br>(Tokyo) |
|  | Japan  | 1029                 | Kimura Hospital IRB                         | Kimura<br>Hospital                            | Ota-ku<br>(Tokyo)      |
|  | Latvia | 1230;#1231;#12<br>33 | P. Stradins Clinical University             |                                               | Riga                   |

|  |             |                                                                              |                                                                                                                            |                            |                              |
|--|-------------|------------------------------------------------------------------------------|----------------------------------------------------------------------------------------------------------------------------|----------------------------|------------------------------|
|  |             |                                                                              | Hospital EC                                                                                                                |                            |                              |
|  | Lithuania   | 1250;#1251;#1252;#1253;#1254;#1255;#1257;#1259;#1260                         | Lietuvos bioetikos komitetas<br>(Lithuanian Bioethics Committee)                                                           |                            | Vilnius                      |
|  | Mexico      | 1280;#1284                                                                   | Comité Bioético para la Investigación Clínica S.C.                                                                         | NA                         | Mexico City<br>(Mexico City) |
|  | Mexico      | 1281                                                                         | Comité de Ética del Hospital General de México "Dr. Eduardo Liceaga"                                                       | Dirección de Investigación | Mexico City<br>(Mexico City) |
|  | Mexico      | 1282                                                                         | Comité de Ciencia y Bioética en Investigación del Instituto Nacional de Enfermedades Respiratorias "Ismael Cosío Villegas" | NA                         | Mexico City<br>(Mexico City) |
|  | Mexico      | 1283                                                                         | Comité de Ética del Hospital Ángel Leaño                                                                                   | NA                         | Guadalajara<br>(Jalisco)     |
|  | Mexico      | 1285                                                                         | Comité de Bioética en Investigación Christus Muguerza Hospital UPAEP                                                       | NA                         | Puebla<br>(Puebla)           |
|  | Mexico      | 1286                                                                         | Centro de Investigación Médico Biológica y Terapia Avanzada S.C.                                                           | NA                         | Guadalajara<br>(Jalisco)     |
|  | Netherlands | 1310;#1311;#1312;#1315;#1313;#1316;#1317;#1318;#1319;#All sites/central Vote | MEC-U (Medical Research Ethics Committees United)                                                                          |                            | Eindhoven                    |
|  | Norway      | All sites/central Vote                                                       | Regionale komiteer for medisinsk og helsefaglig                                                                            | REK Sør-øst<br>B           | Oslo                         |



|  |                      |                                                                  |                                                     |                                            |                                                     |
|--|----------------------|------------------------------------------------------------------|-----------------------------------------------------|--------------------------------------------|-----------------------------------------------------|
|  |                      |                                                                  | forskningsetikk (REK)                               |                                            |                                                     |
|  | Philippines          | 1380                                                             | Lung Center of the Philippines                      | Institutional<br>Ethics<br>Review<br>Board | Quezon City<br>(Quezon Avenue<br>Extension)         |
|  | Philippines          | 1381                                                             | University of the Philippines<br>Manila             | Research<br>Ethics Board                   | Manila<br>(Pedro Gil St.<br>Ermita)                 |
|  | Philippines          | 1382                                                             | Mary Mediatrix Medical Center                       | Research<br>Ethics<br>Committee            | Batangas, Lipa<br>City<br>(J.P. Laurel<br>Highway)  |
|  | Poland               | 1401;#1400;#1402;#1403;#1404;#1405;#1406                         | Komisja Bioetyki Uniwersytetu<br>Medycznego w Łodzi | NA                                         | Łódź<br>(NA)                                        |
|  | Portugal             | 1430;#1431;#1432;#1433;#1434;#1435;#1436;#1437;#1438;#1439;#1440 | CEIC - Parque da Saúde de<br>Lisboa                 | Not<br>Applicable                          | Lisbon<br>(Lisbon)                                  |
|  | Republic of<br>korea | 1205                                                             | Kyunghee University Medical<br>Center               | IRB                                        | Seoul<br>(1, Heogi-dong,<br>Dongdaemun-gu)          |
|  | Republic of<br>korea | 1207                                                             | Seoul National University<br>Hospital               | IRB                                        | Seoul<br>(103, Daehak-ro,<br>Jongno-gu)             |
|  | Republic of<br>korea | 1200                                                             | Korea University Anam Hospital                      | IRB                                        | Seoul<br>(126-1, Anam-<br>dong 5-ga,<br>Sungbuk-gu) |
|  | Republic of          | 1202                                                             | The Catholic University of Korea                    | IRB                                        | Seoul                                               |

|  |                   |                        |                                                                           |     |                                                                    |
|--|-------------------|------------------------|---------------------------------------------------------------------------|-----|--------------------------------------------------------------------|
|  | korea             |                        | Seoul St. Mary's Hospital                                                 |     | (505, Banpo-dong, Seocho-gu)                                       |
|  | Republic of korea | 1203                   | Chungang University Hospital                                              | IRB | Seoul (224-1 Heukseok-dong, Dongjak-gu)                            |
|  | Republic of korea | 1204                   | Soonchunhyang University Hospital_Bucheon                                 | IRB | Gyeonggi-do (1174, Jung-dong, Wonmi-gu, Bucheon-si)                |
|  | Republic of korea | 1201                   | The Catholic University of St Paul's Hospital                             | IRB | Seoul (Jeonnong 1-dong, Dongdaemun-gu)                             |
|  | Republic of korea | 1206                   | The Catholic University of Korea Incheon St. Mary's Hospital              | IRB | Incheon (665-8, Bupyeong-dong, Bupyeong-gu)                        |
|  | Republic of korea | 1209                   | Chonbuk National University Hospital                                      | IRB | Chonbuk (634-18, Geumam-dong, Deokjin-gu, Jeonju-si, Jeollabuk-do) |
|  | Romania           | All sites/central Vote | Comisia Nationala de Bioetica a Medicamentului si Dispozitivelor Medicale |     | Bucharest                                                          |

|  |                    |                                                                                                                                          |                                                                  |                                                          |                             |
|--|--------------------|------------------------------------------------------------------------------------------------------------------------------------------|------------------------------------------------------------------|----------------------------------------------------------|-----------------------------|
|  | Russian federation | All sites/central Vote                                                                                                                   | Ethics committee of Russian Federation                           |                                                          | Moscow                      |
|  | Serbia             | 1790                                                                                                                                     | EC of Clinical Centre Nis                                        |                                                          | Nis                         |
|  | Serbia             | 1791                                                                                                                                     | EC of Clinical Centre Kragujevac                                 |                                                          | Kragujevac                  |
|  | Serbia             | 1792                                                                                                                                     | EC of Clinical Centre of Serbia                                  |                                                          | Belgrade                    |
|  | Serbia             | 1793                                                                                                                                     | EC of Clinical Hospital Centre<br>Bezanijska Kosa                |                                                          | Belgrade                    |
|  | Slovakia           | 1540;#1545;#1541;#1542;#1543;#1544;#1546;#1547;#1548;#1549;#1551;#1552;#1553;#1554;#1555;#1556                                           | Eticka komisia Kosickeho samospravneho kraja                     | Odbor<br>Zdravotnictva                                   | Kosice<br>(NA)              |
|  | South africa       | 1570;#1571;#1572;#1573;#1574;#1576;#1578;#1579;#1580                                                                                     | Pharma Ethics Independent<br>Research Ethics Committee           |                                                          | Pretoria<br>(Gauteng)       |
|  | South africa       | 1581                                                                                                                                     | University of Stellenbosch<br>Human Research Ethics<br>Committee | Division of<br>research<br>development<br>and<br>support | Cape Town<br>(Western Cape) |
|  | South africa       | 1575                                                                                                                                     | University of Cape Town Human<br>Research Ethics Committee       | Faculty of<br>Health<br>Sciences                         | Cape Town<br>(Western Cape) |
|  | Spain              | 1602;#1601;#1603;#1604;#1605;#1607;#1610;#1611;#1612;#1614;#1613;#1617;#1616;#1618;#1620;#1623;#1624;#1626;#1631;#1630;#1629;#1628;#1627 | FUNDACIÓ UNIÓ CATALANA<br>D'HOSPITALS                            | Comité Ético<br>Investigación<br>Clínica                 | Barcelona<br>(Barcelona)    |
|  | Sweden             | 1651;#1650;#1652;#1655;#1656;#1657                                                                                                       | Regionala<br>etikprövningsnämnden i Lund                         | Box 133                                                  | Lund                        |

|  |        |      |                                                                           |                                                  |                |
|--|--------|------|---------------------------------------------------------------------------|--------------------------------------------------|----------------|
|  | Taiwan | 1670 | Institutional Review Board                                                | Taipei<br>Veterans<br>General<br>Hospital        | Taipei         |
|  | Taiwan | 1671 | Research Ethics Committee                                                 | National<br>Taiwan<br>University<br>Hospital     | Taipei         |
|  | Taiwan | 1672 | Research Ethics Review<br>Committee                                       | Far Eastern<br>Memorial<br>Hospital              | Taipei         |
|  | Taiwan | 1673 | Research Ethics Committee                                                 | China<br>Medical<br>University<br>Hospital       | Taichuang      |
|  | Taiwan | 1674 | The Institution Review Board of<br>Taichuang Veterans General<br>Hospital | Taichuang<br>Veterans<br>General<br>Hospital     | Taichuang      |
|  | Taiwan | 1675 | Institutional Review Board                                                | Chang<br>Gung<br>Medical<br>Foundation           | Taoyuan County |
|  | Taiwan | 1676 | Institutional Review Board                                                | National<br>Cheng Kung<br>University<br>Hospital | Tainan         |

|  |                   |                                                      |                                                                             |                                                               |                               |
|--|-------------------|------------------------------------------------------|-----------------------------------------------------------------------------|---------------------------------------------------------------|-------------------------------|
|  | Taiwan            | 1677                                                 | Institutional Review Board                                                  | Chang<br>Gung<br>Medical<br>Foundation                        | Taoyuan County                |
|  | Thailand          | 1751                                                 | The Office of Human Research<br>Ethics                                      | Khon Kaen<br>University                                       | Khon Kaen                     |
|  | Thailand          | 1752                                                 | Research Ethics Committee                                                   | Faculty of<br>Medicine,Ch<br>iang Mai<br>University           | Chiang Mai                    |
|  | Thailand          | 1753                                                 | The Research Ethics Committee                                               | Faculty of<br>Medicine,<br>Prince of<br>Songkla<br>University | Songkla                       |
|  | Turkey            | 1697;#1696;#1695;#1694;#1693;#1692;#1691;#1690       | Baskent University Medical<br>Faculty Clinical Research Ethics<br>Committee | -                                                             | Ankara<br>(Besevler)          |
|  | United<br>Kingdom | All sites/central<br>Vote                            | Yorkshire & The Humber - Leeds<br>West                                      | TEDCO<br>Business<br>Centre                                   | Rolling Mill Road<br>(Jarrow) |
|  | Argentina         | 4003;#4008;#4011;#4014;#4017;#4019;#4023;#4027;#4029 | Comite Independiente de Etica<br>para Ensayos en Farmacologia<br>Clinica    | NA                                                            | CABA<br>(Buenos Aires)        |

**Notes:**

**Abbreviations:** NA, not available.
